# Supplementary material
Source: PubMed Central journal article supplement (PMC2817373)
Supplement: 418157.f1.pdf [file 418157.f1.pdf]

**Figure S1. Clustal-W generated bootstrapped phylogenetic tree comparing *T. congolense* putative MSPs with predicted homologues from *T. brucei* TREU927, *T. brucei gambiense*, *T. brucei vivax*, *T. brucei rhodesiense*, *T. cruzi*, and *Leishmania* sp. (taxid 5658).**

Protein sequence alignments of proteins listed in Table 1 were generated using ClustalX ver 2.0.7 (Larkin et al., 2007). Phylogenetic trees were generated by ClustalX using the bootstrapped N-J method with 1000 iterations. The unrelated *E. coli* protease HflB was included as an outgroup for alignment. Bootstrap values greater than 500 are indicated at respective branch points. Genetic distance is indicated by the scale bar in the upper right corner. *T. congolense* MSPs are indicated. Numbering follows that used in Table 1 and Figure 3.

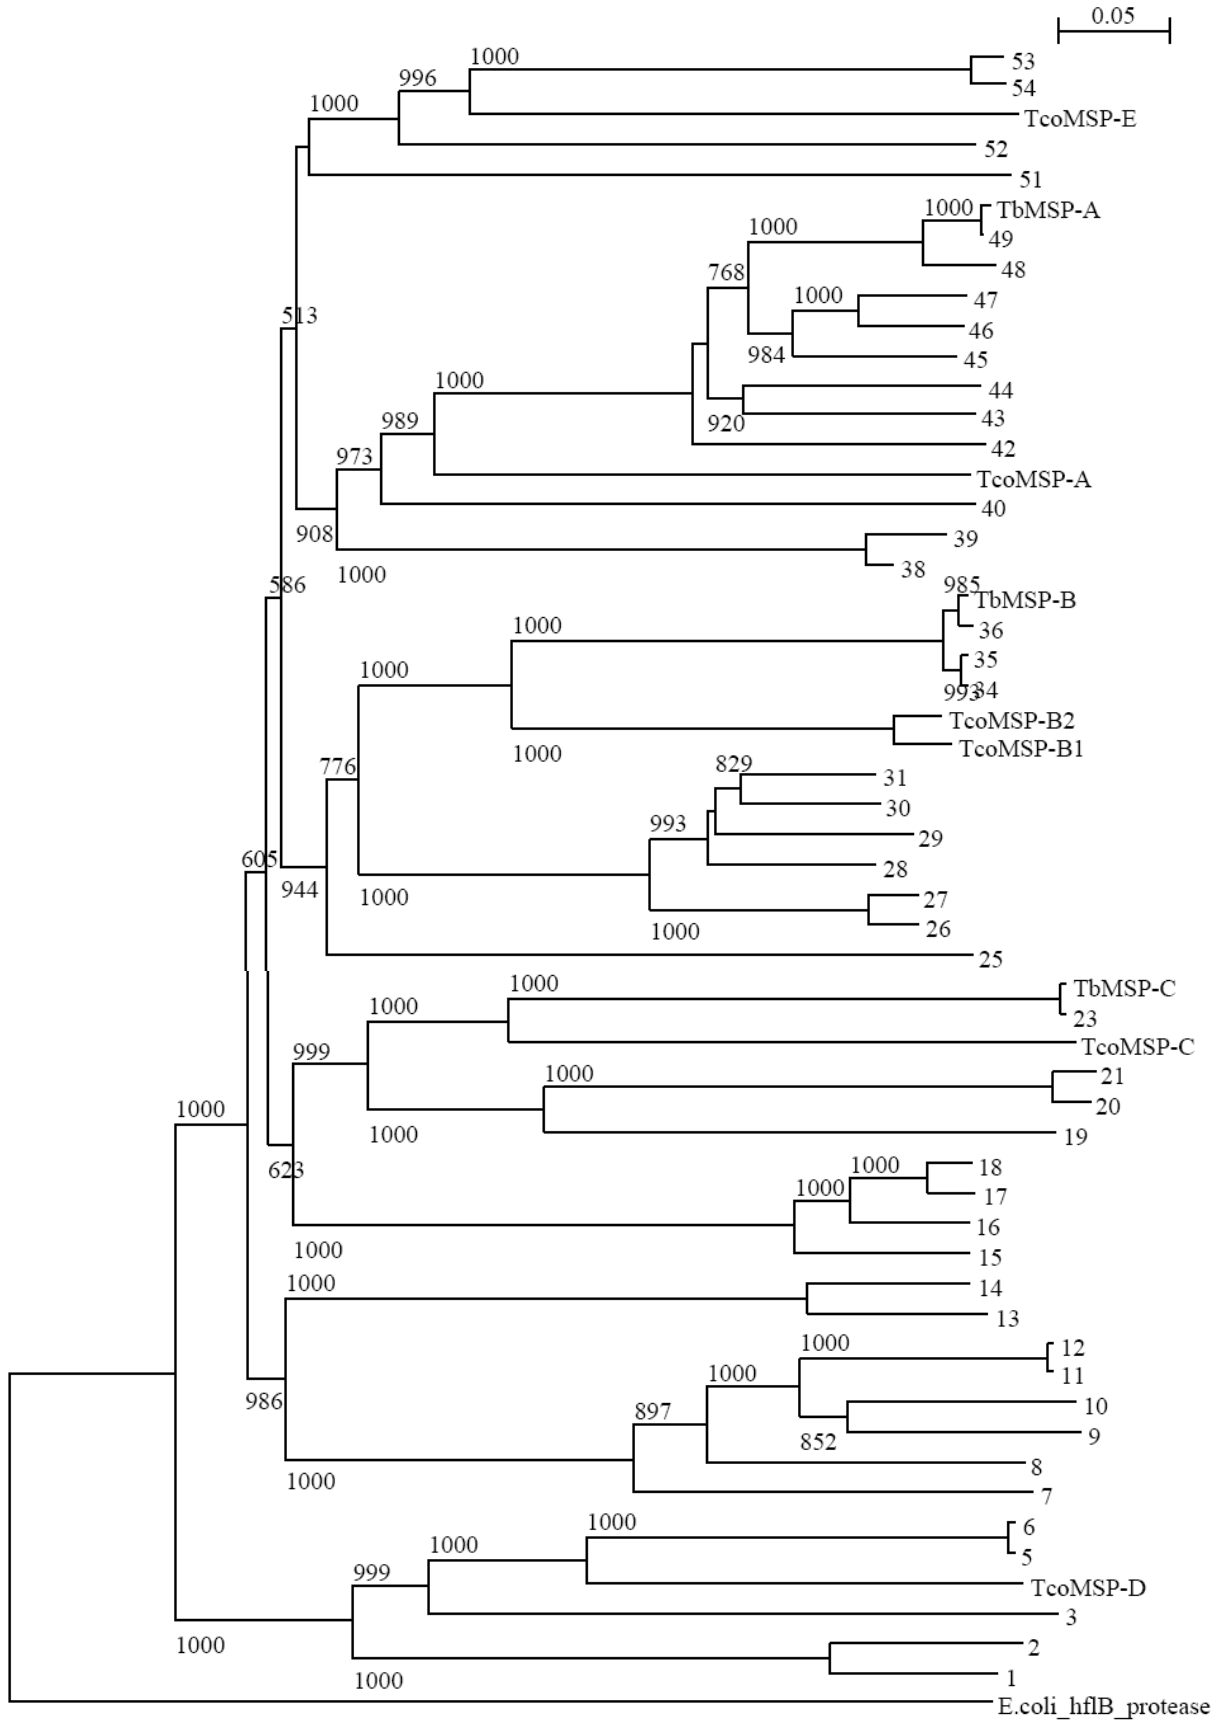

Supplementary Figure S1

**Supplementary Data: Primary amino acid sequence for analyzed proteins.**

*E.coli\_hflB* protease = outgroup

MAKNLILWLVIADVLMVSFQSFQSPSENGRKYVDYSTFLQEVNNDQVREARINGREINVTKKDSN  
RYTTYIPVQDPKLLDNLTKNVKVVGEPPEEPSLLASIFISWFPMLLLIGVWIFFMRQMGGGG  
KGAMSFQSKARMLTEDQIKTTFADVAGCDEAKEEVAELVEYLREPSRFQKLGKIPKGVLMVG  
PPGTGKTLAKAIAGEAKVPPFTISGSDFVEMFVGVGASRVRDMFEQAKKAAPCIIFIDEIDAV  
GRQRGAGLGGGHDEREQTLNQMLVEMDGFEGNEGIIVIAATNRPDVLDPALLRPGRFDRQVVVG  
LPDVRGREQILKVHMRRVPLAPDIDAAIIARGTPGFSGADLANLVNEAALFAARGNKRVSVMVE  
FEKAKDKIMMGAERRSMVMTEAQKESTAYHEAGHAIIGRLVPEHDPVHKVTIIPRGRALGVTF  
LPEGDAISASRQKLESQISTLYGGRLAEIIEYGPHEVSTGASNDIKVATNLARNMVTQWGFSEK  
LGPLLYAEEEGEVFLGRSVAKAKHMSDETARIIDQEVKALIERNYNRARQLLTDNMDILHAMKD  
ALMKYETIDAPQIDDLMARRDVRPPAGWEEPGASNNSGDNGSPKAPRPVDEPRTPNPGNTMSEQ  
LGDK

1. *T.cruzi* XM\_808234

MLGKRPFICISDVFWLATCMLLCLMAVAAAYETRPEDGLREHKCVHDEVAIPYNALPYTDVITYRS  
GIRNMKVFSVFMTAARENIRFHVIFILNKSCSGVGQFVPNFLGNGVRCCTADDILTPNKIRTIKI  
MVKKACNYLERAILVDPLDEINVIAESCPFLGHSSLRVTEKDYLFLVTANPRSSARGVIAWAHC  
CERISTGRPSVGHVNFIPSSFGEYATEKDIHVAMHEITHALGFTDLATNAKSHVGPGGKVVPGF  
VRVLRPKLGKAVTLVTSKVVVEVARKHFGCPTLDGVEIEDGGKSGTAGSHWKKRILYEEALVGS  
ITSANLFYSSFTLAYLEDLGYYSINYSMAEDNFRWGRNRSCRFLYNKCNQDQEDVDFCFGKGD  
AKKTSCTHDFLGMGSCDIMRHNAVLPVDYRYFTDPRIGGSTPLMDYCPVQVYSNWNCSI SEVTA  
EVPNFLGNEMGQHSRCSNLTGASPPFFSTGFRCFPTVCTKSGQILLRVQGGQTVPCPLNGTAG  
EADTSHLRGVQKIVCPAASLLCGDKERNVFSSEFHYSSNMIEEPVTADTKRSASEFTKNSSRL  
CEERVKCAENITSSFPACRVSAQLILDGFCGKDCPLAMRMWIDRTALLEQCRHPKLI AELCLD  
MGHLLCAIASSTSAATATYFPIIVVCVMLLAIVFF

2. *T.cruzi* XM806897

MDECSCLTLRKVFVSYGSFFFFVLVWFGVLCWKKFILLLLLQKERQEGGEMLRKGPFCISDVFWL  
ATCTLLCLMAVAAAYETRPEDGLREHKCVHDEVAIPYNALPYTDVITYRS GIRNMKVFSVFMTAA  
REDIRFHVIFLLNKSCSGVGQFVPNFLGDEVRCTADDILTPKKIRMIKIMVKRACNFLEQAILV  
DPLDELNVMAESCPFLGHSSLRVTEKDYLFLVTANPRSSARGVIAWARSCERISTGRPSVGHAN  
FIPSSFFGEYATENDIHVAMHEITHALGFTDLATNAKSHVGPGGKVVPGFARVLRPKLGKVVTLV  
TSPKVVVEVARKHFGCPTLDGVEIEDGGKSGTAGSHWKKRILYEEALVGSITSANLFYSSFTLAY  
LEDLGYYSINYSMAEDNFRWGRNRSCRFLYNKCNQDQEDVDFCFGNAMKTSCTNDFLGMGS  
CDIMRHNAVLPVDYRYFTDPRMGGSIPLMDYCPVQVYSNWNCSI SEVTAEVPNFLGNEMGQHSR  
CFSSNLTGASPPFFSTGFRCFPMVCTKSGQILLRVQGGQTVPCPLNGTAG EADTSHLRGVQKII  
CPAAILLCRDKERNISSEFHYSSNMIEEPVTAETKRSASEFTKNSSRLCEERVKCAENINSFF  
PACRVSAQRILDCFRDCPLAMRMWIDRTALLEQCRHPKLI AELCLDGMGAHRLCAIASSTSA  
ATAIYFPIIVVCVMLLAIVFF

3. *T.b.vivax* 1037d01.p1k

MGEKGRSGTACTGARARPWLLVILLCATVI PRANGSEPLLRGAKRHVCIHDQVALPSHIVHTI  
QPVPPELQRAYEASETGEHAVNVTIGDIDGRERNVTEKNMRFQIVYLFDSACKNVGQSVTTFVAG  
MKKCGREDILTKWRIRSLKVMKAAATSFLSNALLVNRTRMOKIQENVCVHLKSPAVETLEGDFV

VFVTANPSSDETSTVAWALHCAKHGTTKRPIVGHVNFIPSLIERRPSLIDEQVAIHELTHALGF  
TNLASAAAKSVSSGGQVREGVKTVLRPYLGKQVTVITMPKVVTAARRHFGCPSLDGLEVEDMGP  
AGTRGSHWKKRILFHEALVGTITSGRMYSSMTLAFLEELGFYKANFSAEEDDFSWGKRKGCDF  
VLRKCNDQPANVTEFCFRNLITAECTADHSSLGACDVVTHGMKLPTEFQYFEDPARGGSSAEM  
DYCPTVSGYENAHCSAEMRFPFMNFFGNEMGFESYCFKSNVITSVFPNPPMGARCFPATCTPEG  
QVVLRVQGQTVLCPADGKEGTADTAHLIGVRGRITCPVKNRICPTQTKGGPRVQQSTGKESDDE  
EKPPPPVTRGPPAFSKSYESSCSERTTCVGQHANLFPACGLMLRKIVECFGNDCMNEMAQAFGT  
SSMKKLCSNPQRAAELCMDGWAGANELCSLVNSFHSPSLFSLSFNEAVAKFAPGR

4. TcoMSPD

MRTEVARGWCSFATVLLLTGVASDAHGRGGSGKGDDYKHTCVHSEVSI PYDELVTVDSTLGLRR  
AYVAENDNVSNNQLNATAPASTEKVEKQPAKKVVRNLRFYIHYMLERACKSVGEVVP SYIKK  
AKTVCTADDVLTNWKKRSLKVMMEAA TKFLSSALLVDPLEGVPVTVENC SGLPIPLLVAKDSY  
VVYVTANPRSERGGTTVAWALACVRDRKTGRPVVGHINFIPSSIQRNPASLSEHVAMHELHAHAI  
GFSNIHRMELHATLRKYPTGGAKRVFRSGLRKNVTIITSPKVLEVARKYFGCPELDGVEVEDA  
GIDGTQGSHWKKRILFNEALVGSVTSGR LFFSSLTLAYFEDLGYYTANYSAAEDEMSWGRGRGC  
DFLYKRCNEQSKNVDEF CFSSNMLNFACTRDRSSLGGCDLTTYSEDLSPKYRYFDDPRLGGSSP  
EMDYCPALMGFENAFCGAELGFPFMNIFGNEMGTHSLCYDSDIITSVLPRIPLAARCFPTTCTP  
SGQMLLRIQGFTVECPKDGSEGYGDT SKLKG I HGKVKCPNSKNFCRNPAMGISKLRFGGAE GNP  
GTFHDGVQGGHSLPTPDVDTWSPTKSSCDARQGYLQKVPYPPFACSLAARKLKEYLGSDCRSLL  
SRWSYLHAVTTSCGKPEKVMKKCMDGWRGVVELCKMVS

5. *T. b. gambiense* 11\_v2.orf3

MLHHKLDTVSVIALLLTLRGTAADDNITGEEEGTGHRMHNDAVVPYDELPSMDVVHDLQTAHV  
AEVSNNTEGEGNKSKSVERKNVRFHIKYALGETCKGIGMTVPTYIKGTTKECTEDDVLTKWKL  
SVKVMMEAA TKFLSSALLVDPLEAVNVPGGKCSGVQVPKMTVPNADYVVFVTINPRPEEETTV  
AWAAACRKDTRSGRPVVGHINFIPAAIQRNPSSLAEHVAMHELHAHAI GFS DIAETMLRAPNGLG  
AKGSQRVYRKGLGKAVTLITSPKVLKVAREYYGCPGLDGVEVEDAGSEGTRGSHWKKRILFNEA  
LVGSVTSGQLFFSPLTLAYFEDLGFYTANYSTAETGMTWGKGRGCDFLYQKCD SHPREWGEFCF  
RKEMFVSTCTLDRSSLGACDIITHPEDLPQLYRYFDDPRVGGSSAEMDYCPTVMGFVNAYCTAE  
LGF AFMNVFGNEMGVHSLCYDSDVITSVFPNPFPAARCFPTTCTPSGQLLLRVQGR TVACPRDG  
KAGLGDT SKLKG VHGKVQC PPS ENFCKNSGNGISKLQLASVADEV DGSNTERIGHSLISPTPH  
TWNSEDMGSCSSRLACLKDIPPPFACSLAARKVKECLGNDCPGSAQQWRYANEVGN SCLNPEG  
MVAMCMDGWRGVNELCGAVDPESKLGRSYRSM LPF

6. *T. brucei* TREU927XM\_823726

MLHHKLDTVSVIALLLTLRGTVADDNITGEEEGTGHRMHNDAVVPYDELPSMDAVHDLQTAHV  
AEVSNNTEGEGNKSKSVERKNVRFHIKYALGETCKGIGMTVPTYIKGTTKECTEDDVLTKWKL  
SVKVMMEAA TKFLSSALLVDPLEAVNVPGGKCSGVQVPKMTVPNADYVVFVTINPRPEEETTV  
AWAAACLKDTRSGRPVVGHINFIPAAIQRNPSSLAEHVAMHELHAHAI GFS DIAETMLRAPNGLG  
AKGSQRVYRKGLGKAVTLITSPKVLKVAREYYGCPGLDGVEVEDAGSEGTRGSHWKKRILFNEA  
LVGSVTSGQLFFSPLTLAYFEDLGFYTANYSTAETGMTWGKGRGCDFLYQKCDNHPREWGEFCF  
RKEMFVSTCTLDRSSLGACDIITHPEDLPQLYRYFDDPRVGGSSAEMDYCPTVMGFVNAYCTAE  
LGF AFMNVFGNEMGVHSLCYDSDVITSVFPNPFPAARCFPTTCTPSGQLLLRVQGR TVACPRDG  
KAGLGDT SKLKG VHGKVQC PPS ENFCKNSGNGISKLQLASVADEV DGSNTERIGHSLISPTPH  
TWNSEDMGSCSSRLACLKDIPPPFACSLAARKVKECLGNDCPGSAQQWRYANEVGN SCLNPEG  
MVAMCMDGWRGVNELCGAVDPESKLGRSYRSM LPF

7. *L.braziliensis* XM001562766

MSRDRSVTARLMRLAAAGLVMAVGA AVWAQAAGHHC IHDRLQARVLQSVAAQRRPPGSVSALG  
LPYVSADP ISSAHAVDWALADSTSPSVAHSPDWGTLRILTSLEDLNDPDCYCSYVGQLIDNHQG  
AIDICEAEDVLT EEKRNILV TYLLPLALQLHVERLKVRQVQGTWKVVTGMEGDVCGTFKVPEEHV  
TVGVSNTDFVLYVASVPSEPGVLA AAVICQTFSDSRPAVGVINIPAANIRSPYDQLMVRTVTHE  
VAHTLGFDLTLFDELEL IDEVNNLRGKDY EAPVLS SPTVVAKAREQYGCPTLEFLELEDTGGGS  
AAGSHLKGRNAKDELMAPVSAAGYYTAL TMAVFQDLGFYRADFTKAEVMPWANLASCDFLTNKC  
MERNITQWPGMFCNTTEPSYRCTSDRLKIGRCSITTYDDPMPTYFRYFTETS VGGRISFMDYCP  
VIVGYGTAACNQDPSTASPTVKEFSLFSDSSRCLDGNFAPKHNTGPSDHYNSLCANVKCDRAHH  
TYSVQVYGSSGYVACTPGESVELATI ISTAFVEGSYI ICASYVEVCQANIKGLIDFEGDAADTAA  
V

8. *L.guyanensis* LEIGP63X

MPLNSSSTHRRRSVAARLVRLAAAGVAAALAVGTAAAWAHAAATPHRCI HDKLQARVRDSAAHR  
RMPPSAVSAVGLPYIALDAADTVARAADWGTLRIAVSTADLTDPDYHCTR VGQRVSNHADEIVT  
CTAEDVLT EEKRDILVSYLIPQALQLHAERLKVRQVQGTWKVVTGMTG SICGDFSVPTAHLTAGV  
SNADFVLYVASVPSEPGVLA WATTCQVFSDDHPAVGVINIPAANIVSRYDQGTTRTVTHEVAHA  
LGFSSTFFKSTGVVMNVTGVRGKPF AAPVINSSTVVAKAREQYGCPTLEYLEVEDQGGSGSAGS  
HLKGRNAKDELMAPASAAGYYTAL TMAVFEDLGFYKADFAKAEVMPWGRNASCDFLTKKCMENN  
ITQWPEMFCNTT DENALRCPTDRLRIGKCAISTYSTPMPYFYFTNPALGGLSAFLDYCPFIV  
GYSNGACNQDPSTAPALLKEI SLFSDASRCLDGAFRPTTTREDVTYAGLCANVKCDTTARTYSV  
QVRGSSGYVACTPGESVELATLSAAFVNGSYITCAPYVEVCQANVQGATSSGNAAGRRGPRAA  
VTALLVAALLAIACA

9. *L.mexicana* X64394

MPVDSSSTHRHRCVAAPLVRLAAAGAAVTVAVGTA AAWAHAGAPQHRCIHDAMQARVLQSVAAQ  
RMAPSAVSAVGLPYVSVVPVENASTLDYSLSDSTSPGVVRAANWGALRVAVSAEDLTDPAYHCA  
RVGQQVNNHAGDIVTCTAEDI L TDEKRD TLVKHLVPQALQLHRERLKVRQVQGKWKVVTGMADVI  
CGDFKVPPEHIT EGVNTDFVLYVASVPSEESVLAWATTCQVFPDGHPAVGVINIPAANIASRY  
DQLVTRVVTHEMAHAVGFSGTFFGAVGIVQEVPHLRKDFNVSVITSSSTVVAKAREQYGCNSLE  
YLEIEDQGGAGSAGSHIKMRNAKDELMAPAASAGYYTAL TMAVFQDLGFYQADFSKAEEMPWGR  
NVGCAFLSEKCMKNVTKWPAMFCNESAA TIRCPDRLRVGTCGITAYNTSLATYWQYFTNASL  
GGYSPFLDYCPFVVG YRNGSCNQDASTTPDLLAAFNVFSEAARCIDGAFTPKNR TAADGYTAL  
CANVKCDTARTYSVQVRGTNGYANCTPGLRVKLSVSDAFEKGGYVTCPPYVEVCQGNVKA AK  
DFAGD TDSSSSADDAADKEAMQRWSDRMAALATAT TLLLGMVLSLMALLVVRLLLTSSPWCCCR  
LGGLPT

10. *L.donovani* AJ495007

MSVDSSSTHRHRSVAARLVRLAAAGAAVIAAVGTAAAWAHAGAVQHRCIHDAMHPRVRQSVARH  
HTAPGAVSAVGLPYVTLDTAAAADRRPGSAPT VVRAANWGALRIAVSTEDLTDPAYH CARVGR  
VNNHAGAIATCTADDI L TDEKRD ILVKYLIPQALQLH TERLKVRQVQDKWKVVTDMVDEICGDFK  
VPPAHITDGLSNTDFVMYVASVPSEEGVLA WATTCQVFS DGHPAVGVINIPAANIASRYDQLVT  
RVVTHEMAHALGFSGTFFTEILVVTQMMNIRGKDFNVSVINSSSTAVAKAREQYGCPTLEYLEIE  
DQGGAGSAGSHIKMRNAKDELMAPAAAAGYY SALTMAIFQDLGFYQADFSKAEEMPWGRNAGCA  
FLSEKCMQNITKWPAMFCNVSVDVRCPT SRLMLGTGIRGYSTPFSPYWQYFTNISLGGYSP  
FLDYCPFVIGYGDGSCNQDASLATGFFGAFNVFSDAARCIDGAFRPNR TAADGY YAGLCANVR

CDTATRITYSVQVCGSMDYVNCTPGLRVELSTVSSAFEEGGYITCPPYVEVCQANVKGAKDFAGD  
SDSSSSAGDAADRAAMQRWNRMAGLATAAMVLLGMVLSLMALVVVWLLLLLTCPPWCKFGGLP  
T

11. *L. major* XM001681325

MSVDSSSTHRRRCVAARLVRLAAAGAAVTVAVGTAATAWAHAGALQHRCVHDAMQARVRQSVADH  
HKAPGAVSAVGLPYVTLDAAHATAAADPRPGSARSVVRDVNWGALRIAVSTEDLTDPAHYCARV  
GQHVKDHAGAIVTCTAEDILTNEKRDILVKHLIPQAVQLHTERLKVQQVQGGKWKVTDMVGDICG  
DFKVPQAHITEGFSNTDFVMYVASVPSEEGVLAWATTCQTFSDGHPAVGVINIPAANIASRYDQ  
LVTRVVTHEMAHALGFSGPFEDARIVASVPNVRGKNFDVPVINSSTAVAKAREQYGCDTLEYL  
EVEDQGGAGSAGSHIKMRNAQDELMAPAAAAGYYTALTMALFQDLGFYQADFSKAEVMPWGQNA  
GCAFLTNKCMESQSVTQWPAMFCNESEDAIRCPTSRLSLGACGVTRHPGLPPYWQYFTDPSLAGL  
SAFMDYCPVVVPYSDGSCTQRASEAHASLLPFNVFSDAARCIDGAFRPKATNGIVKSYAGLCAN  
VQCDTATRITYSVQVHGSNDYTNCTPGLRVELSTVSNAFEGGGYITCPPYVEVCQGNVQAAKDGG  
NTAAGRGPRAAATALLVAALLTVAL

12. *L. major* XM001681324

MSVDSSSTHRRRCVAARLVRLAAAGAAVTVAVGTAATAWAHAGALQHRCVHDAMQARVRQSVADH  
HKAPGAVSAVGLPYVTLDAAHATAAADPRPGSARSVVRDVNWGALRIAVSTEDLTDPAHYCARV  
GQHVKDHAGAIVTCTAEDILTNEKRDILVKHLIPQAVQLHTERLKVQQVQGGKWKVTDMVGDICG  
DFKVPQAHITEGFSNTDFVMYVASVPSEEGVLAWATTCQTFSDGHPAVGVINIPAANIASRYDQ  
LVTRVVTHEMAHALGFSGPFKDDARIVASVPNVRGKNFDVPVINSSTAVAKAREQYGCDTLEYL  
EVEDQGGAGSAGSHIKMRNAQDELMAPAAAAGYYTALTMALFQDLGFYQADFSKAEVMPWGQNA  
GCAFLTNKCMESQSVTQWPAMFCNESEDAIRCPTSRLSLGACGVTRHPGLPPYWQYFTDPSLAGL  
SAFMDYCPVVVPYSDGSCTQRASEAHASLLPFNVFSDAARCIDGAFRPKATDNGIVKSYAGLCAN  
VQCDTATRITYSVQVHGSNDYTNCTPGLRVELSTVSNAFEGGGYITCPPYVEVCQGNVQAAKDGG  
NTAAGRGPRAAATALLVAALLAVAL

13. *L. major* XM001684283

MCRTLLGIAVAFALVCCVVGPGAAQGHPERADSEEPRCGFDELEAHTIGTRVSGISRVELPTGE  
LVVAAAATGALQPIRIAVFTDDISNSSQHCTASGQSRPNFRGSRVTCSAAEVLTRAKKRVLLEL  
LIPSAVQLHQERLNVQRVNGNIVVDSSIQKDRVCGQFSIREEHMKTGVKDADFVLYMSAAPTSG  
SVIAWALKCQNFNDRPSVGVVNI SPKYIAADPKTVRVI AHEVLHALGF SRSV FQERNMLAMAS  
FRSKGSPVICSEKVVAKAQQHYGCKTQAFMELEDTGDIDDASSHWKRRNAKDELMAGFSGVGI  
YSALTIAAMEDTGYQGNYAKAEPMAYGHDAGCKLSSDQCVTNSTSQIPGMFCDAPDAPWSCTS  
DRLGVGRCILTSKSNLPTYFYFQYFSDPRLGGPDPLMDFCPVVEVAEGTMCAATTNALKGSVYGV  
MSRCVDTPVGF SMDDSAVRQH GICVEVQCDSTKYI KANGASAF CDCPPGSTYNLSTLSPSFSK  
GYLVCPSYESVCAIKINASLYEEYSGF LTDHSVAGVLT SVKAVVAVLLVLFMV

14. *L. infantum* XM001470056

MRRTLLGIAVAFALVCCVVGAGAAQGDPERADSEEPRCGFDELEARMIGTRVSVISRVEPPTGE  
LAVAAAATGAWQPIRIAVFTEDISNSSQHCTASGQSRPTFRGGRVTCSAADVLTREKKRVLLEL  
LIPSAVQLHQERLNVQRENGNIVVSPFIKNSICGQFSIPEEHMKTGVDPADFVLYMSAAPTSG  
SVIAWAVKCSQSFNDRPSVGVATISPKYITAEPKTVRVVAHEVLHALGF TRSVFKQQNMLVMAS  
FRGKSPSPVIRSANVVAQAQLHYGCKTQASMELEDEGGKGTVSSHWRKRSKDEL MAGFSGVGV  
YSALTIAAMEDTGYQGNYAKAEPMAYGHEVGCKLSSERCVIKSTSQIPGMFCDAPDAPWSCTS  
DRRGIGRCILTSYKSNLPTYFYFGDPRLGGPDPLMDFCPVRAADDTMCAAKTNALKGSVYGV

MSRCVDTPAGFSIDDSAVQQHGICAEVQCGSSAYGVKINGASAFRDCPPGSTYNLSTLSPSFSK  
GHLVCPSESVCAININASLYEEYSRLLTDHSVTGARTSVTAVVAVLLVVLFMG

15. *T. cruzi* XM802134

MRQPRRTALLMLLPWLMMVCCAGACVAADRAVKHRCGFDAMMKYGRLLPTAVVREVPRRGQA  
VQAYTAASEDGGDWAPIRIKVS AEDMHDPLRHCTAAGDLRINHFGRAITCETDDVLTEERRNI  
VLRQTLPAAIQLHAERLSVRSVTGPVVI PQTGLGMCNNFTIPRRHHTVGVADADMILYANIFPT  
SGPTAWATPCFLDDGRPVVA AVNFDPQVAVTSRNVRVAAHELGHALGFARVQFLKLRMISEV  
PNVRGISKVSVLSTPKTKAMARQYHNCSTLEGVELEDEGGSGIALSHWRKRNMKDELMTSDVGV  
GLYSALTAAAFEDMGVYVANYSAAELLWVGNNSGCGLLEKKCLTDGITEY PQLFCNEFDDEK F  
FCTYDRLSLGYCRLMRHEEALPQEYRYFADPRVGGDDPCMSRCPYFEAYSNGGCTNGDPSVLP G  
SVVGPNSRCVKGQDLQFDD EYIGDVCVDTRCGDGLSVRFLDDDAWHECQAGETVTPPSGPWRG  
SIVCPQYADVCTAFPNI SGPYIPVVDPLVDDPTSAEGAEGDGGEVPRKRPRRL

16. *T. cruzi* XM807916

MRQPRHTTPLLPLLLPWLMMVVCCTGVCVAADRAVKHRCGFDAMMKYGRLLPTAVVREVPRRGQ  
GAVQAYTAASEDGGDWAPIRIKVS AVDMFDP LRHCSAAGDLRVDHDGRAITCEADDVLTEEKR  
NIVLRQILPAAIQLHAERLSVRPVTGPVVI PQTGLGLCGNFTIPRRHHTVGVAGADMILYVKIF  
PTSGPAAWAAPCFLLDDGRPVAA AVNFDPKRVAATNVYVRVAAHELGHALGFVDYFMMLHMIS  
EAPNVRGMSKVS VISTPKAKAVARQYHNCPTLEGIELEDEGGSESVLSHWKKRNLDELMTSDL  
RVGLYSALTAAAFEDMGFYLANY SAAETLWVGNNSGCGLLEKKCLTDGISEY PDLFCNQFSRAG  
YKLC TYNRLSLGRCKLKRHEEALPEEYQYFADPRVGGDGLYMSRCPYVKTYSNAGCTNGNPSVM  
PGSVVGPNSRCVKGQDLQFDD KYIGDVCVDTRCGDSTVSVRFLDDDAWRECQEGETVTPPSGPW  
RGSIVCPQYADVCTAFPNI SSYP IPVVEPLADDPTSAEGAEGDEGEVPRKRPRRL

17. *T. cruzi* XM801120

MRQPRHTAPLLPLLPWLIMVVCCAGVCVAADRAVKHRCGFDAMMKYGRLLPTAVVREVPRRGQ  
AVQAYTATSE DGGDWAPIRIKVS AEDMYNPLRHCTAAGDLRIDHDGRAITCEADDVLTEERN  
IILRQILPAAIQLHAERLSVRPVTRPVLI PRTGLGMCNNFTIPHKHRTVGVADADMI IYANIFP  
TSGPAAWAALCFMLDDGRPVVA AVNFDP RRVAANKGYVRIAAHELGHALGFSVDFVVMLHMISE  
VPNVRGSSKVS VISTPKAKAMARQYHNCPTLEGIELEDEGGPATALSHWKKRSMRDELMTSDVG  
VGLYSALTAAAFEDMGFYLANY SAAEMLWVGNNSGCGLLEKKCLTDGISEY PDLFCNQFSRAGY  
KLCTY NRLSLGRCKLKRHEEALPEEYRYFADPRVGGDNLYMSRCPYVKKYSNAGCTNGDPSVML  
GSIVGPNSRCVKGQELQFDD KYIGDVCVDTRCSDGTL SVRFLRDDAWHECREGETVTPPSGPWR  
GSIVCPQYADVCTAFPNI SSHP IPVVGPLADDPTSAEDAE EDEGETPRKRQRRL

18. *T. cruzi* XM799438

MCQPRHTAPPLLLLPWLIMVVCCAGVCVAADRAVKHRCGFDAMMKYGRLLPTAVVREVPRRGQ  
AVQAYTAASEDGGDWAPIRIKVS AEDMHNPLRHCTAAGDLRIDHNGRAITCEADDVLTEERRS  
IILRQILPAAIQLHAERLSVRPVTGPVVI PQTGLGMDCKFTIPRRHRTVGVAGTDMILYANIFP  
TSGPAAWAALCFMLDDGRPVVA AVNFDP RRVAATNGYVRIAAHELGHALGFSVDFVVMLHMISE  
VLNVRGSSKVS VISTPKAKAMARQYHNCPTLEGIELEDEGGPATALSHWKKRSMRDELMTSDVG  
VGLYSALTAAAFEDMGFYLANY SAAEMLWVGNNSGCGLLEKKCLTDGISEY PDLFCNQFSRAGY  
KLCTY NRLSLGRCKLKRHEEALPEEYRYFADPRVGGDDL YMSRCPYVKKYSNAGCTNGDPSVML  
GSIVGPNSRCVKGQELQFDD KYIGDVCVDTRCSDGTL SVRFLRDDAWHECQEGETVTPPSGPWR  
GSIVCPQYADVCTAFPNI SSHP IPVVDPLADDPTSAEDAE EDEGETPRKRPRRL

19. *T.b.vivax* 942f04.q1k

MVIPYKFVRCCLCLYGAMALALVPPASCI AEAVGTDEGAPAAAPSASDARERKARRAESNVLTDAFNRI GPESKSKCGSGEDLLSKQVVRVLEAPRPSTVPSGLLGAREAESSSGNDGVWASIRIRAFTRDLNDPNRFCTAAGDRRTNFLGT EVVCDASGVLTVRKKRFLKRS LPLGIQMHTDRLSVLPNDQAFALPPLD TVCSAFNIPSSHFTDGVVNADLYVYVGAMQDRANVMAWATVCAKLESGRPLAGVTNIS PQHIRETEEDIRTVAH ELGHILGFSFQHLGDAKVLQQVVVRGNERKVVVDTEHTKRVASKHFNCLSAHGVELENAGGRGT VGVSHIDRRYIMDDLMTQORSVGERYTAFSLAVFESLGYRANYSRAEPSLWGMHSGCGFLRNKCLVNEATAYPAMYCSKSSSL SDEQCTHDRLGIGYCGVFEHNEDIPEYRYFSNPR LGGEVMSDYCPTVTKNVGRNCEHGVAADMYGSFIGPGSRCVKGSRLIYNGRAVSAACVETNCTAKTLRVRLLDGEWQNCPEYRSVSARSKD GKWSGTIICPRHMHACTRNNASSVVLRLP LPPREDDTEPASTSMSAGRQRAVSDTAVAAIKSTAAPAHVGYGTGWQRHCTPHVLSVAI VAFVMSCHVHQLLSHIFTFPLPLCFCLPSIPHLLANLT

20. *T.b.vivax* 1924b07q1k

MLQEAPCLAALLHMLCPATERICPLTHCLTSSASHAHKVKN SMTTMHLSFYRLALLYATVVHVLFPTRNCVAKAVRTHQVTL SAFPSTSAPEKPSARAKLSIPTAAHTPRPNGESVACASDRISLARRSVP AVLVPHTAANGTGFIGAQEAGGQGDAAEWRPIQIRAFTRDLNDPQR FCTAAGDRRVSFLGDDV VCDASSVLT LRKKRFL LERALPLGIKMHS DRLAVRPVDANVALPELESICAAFSVPPEHFVSNPAVADMYVYVGAMQDAS GALAWATTCAVLNDGRPFAGVTNISPWHLKETEEVVRTVTHELGHILGFMSNYFRNVDALKKV TTRGGMDRYIVDTEHTRRV TSEHFNCMN VYGI ELENVGGDGTAGSHIDRRFVADDLMTQRSIGGRYTVFSLASFESLGFYRVNYS CAEPSLWGLHSGCGFFHNECFVNGTTEYPDVFC SRVPVQGD E S C T H D R L G I G Y C N L F E Y T Q D I P E R Y R Y F D N P R L G G E I L A D Y C P S V G L S E N R S C E H G N S E E M H G S F I G K G S R C V R G S D L R Y K E G A V T A A C V E M D C A D R I L R V R V L G G E W Q E C P E G K S V Q P K T N G G L W S G S I I C P R H A D V C A R T E C G A F V L E P L T P Q E N D M E P V S A E I E E T H P D V P N E S S A G A V E G A E S E K P E E V V H D D V I P E D A V S E K S A E D S G T T E S T W A P C L R H L H S A V P V L F I V F V V Y L

21. *T.b.vivax* 1240d01.plk

MLQEAPCLAALLHILCPATERICPLTHCLTSSASHAHKVKN SMTTMHLSFYRLALLYATVVHVLFPTRNCVAKAVRTHQVTL SAFPSTSAPEKPSPHAKLSIPTAAHTPRPNGESVACASDRISLARRSVP AVLVPHTAANGTGFIGAQEAGGQGDAAEWRPIQIRAFTRDLNDPQR FCTAAGDRRVSFLGDDV VCDASSVLT VRKKRFL LERALPLGIKMHS DRLAVHPVDV NVALPELESTCAAFSVPPEHFVSNPAVADMYVYVGAMQDAS GALAWATTCAVLNDGRPFAGVTNISPWHLKETEEVVRTVTHELGHILGFMSNYFRNVDALKKV TTRGGMHRYVVDTEHTRRV TSEHFNCN VYGI ELENIGGDGVVDSHIDRRFVADDLMTQRSIGGRYTVFSLASFESLGFYRVNYS CAEPSLWGLHSGCGFFHNECFVNGT TAYPDVFC SRVPVQGD E S C T H D R L G I G Y C N L F E C T Q D I P E R Y R Y F D N P R L G G E I L A D Y C P S V G L S E N R S C E H G N S E E M H G S F I G K G S R C V R G S D L R Y K E G A V A A A C V E M D C T D R I L R V R V L G G E W Q E C P E G K S V Q P K S N G G L W S G S I I C P R H A D V C A R T E C G A L V L E P L P P Q E N D M E P V S A E I E E T H P D V P N E S S A G T V E G A E S E K S E E V V H D D V I P E D A V P E K S A E D S G T T E S T W A P C L R H L Y S A V P V L F N V F V V Y L

22. TcoMSPC

MLHQGGFTSRLYLLSAVLF SFFHCAF IASGSDSPGV EEAELGQVRSGWCGHGAHVPPPSEMMVFDETPPPSRSGRTAGGLIT AQIASVNESGVKAKNEFGEY GQEELDDSWQPIRIYASTLDMDDPHRFCTRPGDVRDTLTGGGNVTC KEADVLTVRKKRI IKQOALPEAIKM HSSRLFVQRLQRKIVLGRNQIGQCSVFKVPEAHYTN GVDADLLVYVGV RPTIGSIAWAFTCGLLPNGRSVVGSINLSPAFVEE S D F F I R V I V H E L G H V L G F D K G H L V R A R V L Q E V R G V R G L G Q V Y V V N S T I A K R V A Q K H F N C S D V L G



IEMENEGNAVEISHLEQRHAYEDVMSPDGQLTRYTAMTLAVFASLGYRVNFSRAEPTRWGLN  
AGCGFLNDRCVVNGTATHPKWFCDREGGEHSHVCSYDHLSLGRCALGRQEGGPPLEYRYFSDD  
LGGTSLFMDYCPVVVPYSHGKCTGAGGGLLRGSATGRNSRCVKGVNLRYSFRDVGDCVHTDCS  
GGRLRIRFLMDFFWKECKAGELVKPSNIFLWSGGVICPTREEVCFEEDYTLKALKALPRQANDS  
EPAF

23. *T.b.gambiense* 10\_v2

MTQLLGTATFWCIFAAFVSHHLRAHVHVEASATHLEAPEEQWGEETGDTPRGWCGSHHSAINP  
DDVPIVGTMPPESEAKGTTGGDLISARTASVDKPKKYTNVDDYQGEIDSRWKPIRIRAYTQD  
LNDPSRFCTMAGDVRSILVSGKTTVCTAGDVLTVRKKRVIVQVAIPKAIKLHTDRLLVRRYHRR  
IVLPSSYAGYCSLKFVPGHYTNGFEGDVSIIYVAARPTIGNMAWASVCAMLTDRPVSGVVNIS  
PKYVAETDFFVRVIAHELGHALGFQADILIRRGIMKQKGGIRGLKTSWLVDSEVAKRVARKHFN  
CSTAPGIEMENEGGPGVFATHLEQRNAVEDVMAPYGNLNYLTVMSLGVFASMGHYRVNFSRAEK  
TRWGLNRGCSFLQEKCLQEGKSKHPDTFCDHLWKSHLFTCTHDRLGLGQCSLGTHTRTELPAEFR  
YFRNSRVGGKSRFMDHCPMVVQYNSGNCVNGQSKFLRGSEVKGSRVCVKGVNLFKFSNKDIGDVC  
VRTNCTGKELQIRFLLDHSWQTCKPGATVQPLGRHLWKGSIIICPTREEVCFDDEDYKLRLTPLP  
KLPTDDNAAVNPRQM

24. TbMSPC

MTQLLGTAFWCIFAAFVSHHLRAHVHVEASATHLEAPEEQWGEETGDTPRGWCGSHHSAINP  
DDVPIVGTMPPESEAKGTTGGDLISARTASVDKPKKYTNVDDYQGEIDSRWKPIRIRAYTQD  
LNDPSRFCTMAGDVRSILVSGKTTVCTAGDVLTVRKKRVIVQVAIPKAIKLHTDRLLVRRYHRR  
IVLPSSYAGYCSLKFVPGHYTNGFEGDVSIIYVAARPTIGNMAWASVCAMLTDRPVSGVVNIS  
PKYVAETDFFVRVIAHELGHALGFQADILIRRGIMKQKGGIRGLKTSWLVDSEVAKRVARKHFN  
CSTAPGIEMENEGGPGVFATHLEQRNAVEDVMAPYGNLNYLTVMSLGVFASMGHYRVNFSRAEK  
TRWGLNRGCSFLQEKCLQEGKSKHPDTFCDHLWKSRLFTCTHDRLGLGQCSLGTHTRTELPAEFR  
YFRNSRVGGKSRFMDHCPMVVQYNSGNCVNGQSKFLRGSEVKGSRVCVKGVNLFKFSNKDIGDVC  
VRTNCTGKELQIRFLIDHSWQTCKPGATVQPLGRHLWKGSIIICPTREEVCFDDEDYKLRLTPLP  
KLPTDDNAAVNPRQM

25. *T.cruzi* XM799266

MCTIFFFFPGLFLFPFFFFCFACSVRCDRISFCMQMSSFYSSSTLPLILLLLLLLCVRLCSGLVE  
HRCTFDKRTRDGLAPLMVRELPRKGQAFQAYTASEPEWRPLRIGFFTEDLKNKSRYCTAEGDM  
RPDYEGNTVKCEKKHILTEEKRALLINKLLPDSIKLHSDRLLVQPTLFLVLPVSLVGACTLFLI  
PDSHFAEGITGADFILYVAAGPTHDVNVAVGVPALRSGGRPVAVGALNFGPQHISSRQDLSRAV  
AHEIAHALGFSVQLFAESKMVTKLSKIRGKSNVLVVSSEKTREVTREKHFNCDRAPGMELEDEGG  
AGTAQSHWERRNAKDEIMAGVAGIGYYSAMTMAAFEDLGYRANWGMEEVMGWGRNTGCDFL  
KCVNNGTTKYPDMFCVDGSFLFQCTSDHLALGVCGLFHFGRDLHPVYRYFKYPFMGGSPNELTD  
YCPVIMPSGEGACTNTLNFTGCRVGPNSRCVESDLLRFNSVTIGAICVEVSCEHKGVASIRYV  
GDDTWYPCPEGHRLKPGPPFTRGHIICPRYTDICTTLASAVLKPTLDNNTFQNLTPVEGPVQR  
SLSKPLEMKKTDARKKHFGVDAGSVAVTPSLPWLLLCSSLGALLGI

26. *T.cruzi* XM802023

MHQLLNPFISFLKVSQTLTSIQTAKVHCERPKRKKHTRMRHTLLFQVLLCCVSGSVAVAEHHC  
SDEVENKVGPRTTAVVLELPTRGGGMMRALTASAPEWAPIRFQVFTEDLNDPSKHCTAEKQIRP  
DFIGGTLECNKRDIKTKEKRSIIINSLLPRAFRMHTDRLLVRPLTGRVIVPWYFSGVCAQFTIP  
SSHIEGVSGADMYLVVSAGPTRYSTLAWATACSQLIDGRPVVGVVNYGPSFVTNSSENSVRVSV

HEVAHALGFSVWLLQERNMLKEVLNVRGKAKVLQVSSPKTVEKTRHFNCVNATGMELEDEGGE  
GTALSHWERRNAKDELMAGISGIGYYTSLTMAALEDTGIFYKANWGMEEPMSWGNNSGCALLTEK  
CLMNGVTQYPEMFCTAETTLISCTSDRLALGYCTIYLYTAELLQYQYFNSLKLGGSNSSLMDL  
CPYVQPYSNTRCSNGEASIMHGSRVGPRSKCLKGDGLVDFMGRIGDVCAEVSCEKGEVSVRYLG  
DDTWRQCPEGSSITPTGLFTGGKILCPKYDDVCIIFDPLRGGGDVSSLLSVFPSISVILLVFIF  
ISMY

27. *T. cruzi* XM798784

MHQLLNPFISFLKVSQLTISIQTAKVHCERPKRKKHTRMRHTLLFQVLLCCVSGSVAVAEHHC  
SDEVENKVGPRTTAVVLELPTTRGGGMMRALTASAPEWAPIRFQVFTEDLNDPSKHCTAEKQIRP  
DFIGRNLECNKRDI LTKEKRSIIINSLLPRAFRMHTDRLLVRPLTGRVIVPGYSSGVCAQFTIP  
SSHQTEGVSGADMYLYVSAGPTQGSTLAWATTCLKLPDGRPVVGVVNYGPRSVTDSSENSVRVSA  
HEVAHALGFAVWLLQERNMLKEVLNVRGKAKVLQVSSPKTVEKTRHFNCVNATGMELEDEGGE  
GTASSHWERRNTKDELMAGISGIGYYTSLTMAALEDTGIFYKANWGMEEPMSWGNNSGCALLTEK  
CLMNGVNKYSEMFCCTAETTLISCTSDRLALGYCTIYLYTAELPQQYQYFNSLKLGGSNSSLMDL  
CPYVQPYSNTRCSNGEASIMHGSRVGPRSKCLKGDGLVDFMGRIGDVCAEVSCEKGEVSVRYLG  
DDTWRQCPEGSSITPTGLFTGGKILCPKYDDVCIIFDPLRGGGDVSSLLSVFPSISVILLVLIF  
ISMY

28. *T. cruzi* XM815532

MRHTLLFQALLCCVSGSVAVAEHHCISDEIEKKVGPRTTAVVLELPTRESGMMRAMTASDSEW  
APIRFQVFTEDLNDPSKYCTAEGQIRPDFFTGGTVECKEKDILTEEKKSIMLKSLIPQALKMHTD  
RLLVKPLTVNVIPTFYSGICAQFTIPSSHHTEGVSGADMYLYVSAAPIKSSTLAWATTCSRVA  
TGRPIIGVMNYGPNFVTDSEYSVRTLAHEIAHALGFTFGIMKERKMVKEVKVGRGKAAVFQVSS  
PKTVEKTRHFNCMSATGMELEDEGGERTASSHWKRRNAKDELMAGVSGIGYYTALTMAAFEDT  
GFYKANWGMEEPMSWGNNSGCALLTEKCVINGVTKYPEMFCTAESSLLCTSDRLALGHCAMEL  
YDAPLPPQFQYFNSPKLGGVPGFLMDFCPYIETYVNTGCSNGDETVMMSGSRVGPRSKCLKGDGL  
ADSEGLVGDVCAELSCDKGEVSVRYLGDDAWHKCPEGSSITPTGLFMQGRILCPKYDDVCI VFD  
TINGGGDVSSLLSAFPPIPLILLVLIFISMC

29. *T. cruzi* XM815930

MCISAVTITHWYNILLSLHQLCNPFIYSVKVIHSTSIQAAKLCAVKGPKEKTHTRMRQTLLFLV  
LLCCVSGSVAVAAHRCISEKIEKKVGPRTTAVVLELPTTRGGGMIRALTASAPEWAPIRFQFFT  
EDLNDPSRYCTAEGQIRPDFFTGGTLECKGEDILTEEKKSIIILKSLVPRALKMHADRLLEPLTG  
RVIVPKYSSGVCAQFTIPSSHHTVGVFGADMYLYVSAGPTQDSTLAWAHFCTELPDGRPVVGV  
DYGPSVTDSEYGVRALAHEIAHALGFTLEIMEKRNMLKEFEFVGRGKAAVVQVSSPKTVEKTR  
HFNCVSATGMELEDEGGNETALSHWKRRNAKDELMAGIPGIGYYTALTMAAFEDTGIFYKANWGM  
EEPMSWGNNSGCALLTEKCVINGVTKYPEMFCTARSSPLLCTSDRLALGHCAMKLYDAPLPPQY  
QYFPNPKLGGVPDLLMDFCPYIRPNIKTRCSNGDKALMRGSRVGPRSKCLKGDGLADSEGFVGD  
VCAEVSCDKGEVSVRYLGDDAWHKCPEGSSITPTGLFMKGRILCPKYDDVCIFFDTINGGGDAS  
SLLSAFPPIPLVMLLLIFISMC

30. *T. cruzi* XM812094

MRHTMLLLVLLCCVSGSVAVAEHHCISDEIEKKVGSRTTAVVLELPTRESGMMRALTASAPEW  
APVRFQLFTEDLNDPSRYCTAEGQIRPDFFTGGTVECKERDILTEEKKSIIINSLIPRALKMHTD  
RLLVEPLMGRVIVPEFLSGACAQFTIPSSHHTEGVFGADMYLYVSAAPIKGSTLAWAVACSALP  
DGRPVVGVVNYGPRSVTDSSEHSVRLVHEIAHALGFTLEIMEERNMLKEFLNVRGKASVLQVSS

PKTVEKTRHEFNCVTATGMELEDEGGERTASSHWKRRNAKDELMAGLSGIGYYTALTMAALEDT  
GFYKANWGMEEPMSWGNNSGCALLTEKCVMNQVTKYPEMFCTAESRLLSCTSDRLALGYCALKL  
YDAPLPPQFQYFSNPKLGGSPDLLMDFCPYIEEYANAGCSDGNATDMRGSRVGPTSKCLKGDGL  
ADFMGFIGDVCAEVSCDKGEVSVRYLGDDAWHKCEPSSITPTGLFMKGRILCPKYDDVCIVID  
TINGTGDVSSLLSAFPPIPLIILVLIFISMF

31. *T. cruzi* XM798806

MRHTMLLLVPLLCCVSGSVAVAEHCISDEIEKKVGPRTTAVVLELPTRGGGMIRALTASDPDW  
APIRFQFFTEDLNDPSRYCTAEGQIRPDFTGTTVECKREDILKEEKKSIIILKSLVPRALKMHTD  
RLLVRPLMGRVIVPEFLSGVCAQFTIPSSHQIEGVTGADMYLYVSAAPVKGSALAWATSCSALP  
DGRPVVGVVNYGPSSVTDSEYSVRVVVHEIGHALGFAVEIMEERNMLKEVKGVRGKAKVLQVSS  
PKTVEKTRHEFNCVNATGMELEDEGGERTASSHWKRRNAKDELMAGNEGIGYYTALTMAAFEDT  
GFYRANWGKEEPMSWGNNSGCALLTEKCVINGVTKYPEMFCTAESRLFSTSDRLGLGHCTIEL  
YDAPLPPQYQYFSNPKLGGSPGFFMDFCPYIEAYFNTWCTDGEADV MRGSRVGPTSKCLKGDGL  
ADFMGRIGDVCAEVSCDKGEVSVRYLGDDAWHKCEPSSITPTGLFTGGRILCPKYDDVCIVFN  
TINGTGDVSSLLSAFPPIPLVMLVLIFISMC

32. TcoMSPB1

MILISPNASTRKTLTHQAMTPMRSSLALLLTLHHRVLGSSVPPSPRCISDEV TARAGPPVRLA  
TRNIAHSQTGADSEWSNIRIVTFTKDI EDERKHCTAEGQKRPTFFGDTADCTSDDLTAACKGL  
VITRLIPSAVQLHVDRLLVKPEAEPLVLPKFDGKVCSSFTVPASHNTEGVPDADMV MYAAAGPM  
PAGAAAWATTCIVFDDDRPAAGVMNLGVASISLTETSIRTVAHEIAHSLGFTFYSMSNAKAVTR  
VPGVRGKKEVVLVSSPRTLQKTREHYKCPAAAGMELEDEGGSGTAMSHWERRNAKDEFMSGISG  
PGRYTALTMAAFEDLGYRGA WGMEPMGWGNSGCELLTEKCLVEGVTAYPAMFCNGSEVGLT  
CTSDGFALGKCLTVQYESELPAEYQYFSDTKLGGSAHTLMDYCPYIFGYSNTRCSDGDIRHMYG  
SVIGPSSKCLKGNKLLDNESRPVGDV CADVRCDNGTVSVRYLGNSEWHPCPAGGAVTPTETFTG  
GTILCPKYEEVCIVA AVVTKSDTTNPFASVAQPLLLALLVAAVSSS

33. TcoMSPB2

MTPMRSSLALLLTLHHRVLGSSVPPSPRCISDEVAARAGPPVRLATRNIAHSQTGADSEWSNI  
RIVTFTKDI EDERKHCTAEGQKRPTFFGDTADCTSDDLTAACKDLVITRLIPSAVQLHVDRL  
VKPEAEPLVLPKFDGKVCSSFTVPASHNAEGVPDADMAMYAAAGPMPAGVAAWATTCIVFDDDR  
PAAGVMNLGVASISLTETSIRTVAHEIAHSLGFSFYFMSNAKT VTRVPGVRGKKEVVLVSSPRT  
LQKTREHYKCPAAAGMELEDEGGSGTAMSHWERRNAKDEFMSGISGPGRYTALTMAAFEDLGY  
RSVWGMEPMGWGNSGCELLTEKCLVEGVTAYPAMFCNGSEVGLTCTSDGSALGECFTVQYES  
ELPAEYQYFSDTKLGGSAHTLMDYCPYIFGYSNTRCSDGDIRMYG SVIGPSSKCLKGNKLLDN  
ESRPVGDV CADVRCDNGTVSVRYLGNSEWQLCPAGGAVTPTETFTGGTILCPKYEEVCIVA AV  
TKLNTTNSFASVAQPLLLALLVAAVSSS

34. *T. brucei* TREU927XM841902

MFNTITDVTLLFSLFPLFLPCVKKRMLMLPACVIPMHGALKLAILLMLVWCCSLCLAKSGGRC  
MFDEIAAKAGRPRVLALRRTKAGMENVKYDRTGSVDPEWQHIRIVVFAEDMKDRSRYCTSAGQE  
RPTFFGETATCSQEDILTA AKRDI AVTKLLPSAVQMMDRLLDVDPITEPLVFPFDG SVCSEFK  
VPSSH FSEGVPDADMV MYAAAGPTPEGVAAWATGCITLDDGRAVAGVTNLGPGSISLSETSIRT  
AAHEIAHALGFD FEAMNDAGMVQRI PGVRGKVDVTLISSPRTLQKAREHYNCPDAPGMELEDEG  
GSGTALSHWERRNAKDEIMSGISSPGRYTALTMAAFEDLGYRGA WGSEEPMGWGNSGCELLN  
ESCLVNGVTAHPDMFCNETVSKLVCNSERDGLGR CNVIKHENPLPPQYHYFSDPSRGAPSHLLM

DYCPSIDAFSNTPCADGETKFMRGSLIGPSSMCLKAEGLRDSQGVIGDVCADVRCDDGGEVSI  
RYLGDDAWHPCPEGSHIKPTTTFTDGVIVCPTYSEVCIKATVVVVRPSSASYSRSSVPQSL  
LLTLFAIVYAAC

35. *T.b.gambiense* 08\_v2

MFNTVTDVTLFLFSLFPLFLPCMKRRLMVLPAACVIMPHGALKLAILLMLVWCCSLCLAKSGGRC  
MFDEIAAKAGRPRVLALRRTKAGMENVKYDRTGSVDPEWQHIRIVVFAEDMKDRSRYCT  
SAGQERPTFFGETATCSQEDILTAAKRDIKAVTKLLPSAVQMMDRLLVDPITEPLVFP  
SFDGVCSEFKVPSSHFFSEGVPDADMVMYAAAGPTPEGVAAWATGCITLDDGRAVAGV  
TNLGPISLSSETSIRTAAHEIAHALGFDFEAMNDAGMVQRIIPGVRGKVDVTLISSP  
RTLQKAREHYNCPDAPGMELEDEGGSGTALSHWERRNAKDEIMSGISSPGRYTAL  
TMAAFEDLGYRGAWGSEEPMGWGNNSGCELLNESCLVNGVTAHPDMFCNETVSKL  
VCNSERDGLGRCNVIKHENPLPPQYHYFSDPSRGAPSHLLMDYCP SIDAFSNT  
PCADGETKFMRGSLIGPSSMCLKAEGLRDSQGVIGDVCADVRCDDGGEVSI  
RYLGDDAWHPCPEGSHIKPTTTFTDGVIVCPTYSEVCIKATVVVVRPSSASYSR  
SSVPQSLLLTLFAIVYAAC

36. *T.brucei* TREU927XM841905

MLTTHFRCCISPRVSGAYSLFPLFLPCIKRRLMMLPACVIMPHGALKLAILLMLVWCCSL  
CLA KSGDRCMFDEIAAKAGRPRVLALRRTKAGMENVKYDRTGSVDPEWQHIRIVVFA  
EDMKDRSRYCT SAGQERPTFFGETATCSQEDILTAAKRDIKAVTKLLPSAVQMMDR  
LLVDPITEPLVFPFPDGSVCSEFKVPSSHFFSEGVPDADMVMYAAAGPTPEGVA  
AWATGCITLDDGRAVAGVTNLGPISLSETSIRTAHEIAHILGFNFRAMNDAGMVQ  
RIIPGVRGKVDVTLISSPRTLQKAREHYNCPDAPGMELEDEGGSGTALSHWERR  
NAKDEIMSGISSPGRYTALTMAAFEDLGYRGAWGSEEPMGWGNNSGCELLNESCL  
VNGVTAHPDMFCNETVSKLVCNSERDGLGRCNVIKHENPLPPQYHYFSDPSRGA  
PSHLLMDYCP SIDAFSNTPCADGETKFMRGSLIGPSSMCLKAEGLRDSQGVIGD  
VCADVRCDDGGEVSI RYLGDDAWHPCPEGSHIKPTTTFTDGVIVCPTYSEVCI  
KATVVVVRPSSASYSRSSVPQSLLLTLFAIVYAAC

37. TbMSPB

MLTTHFRCCISPRVSGAYSLFPLFLPCIKRRLMMLPACVIMPHGALKLAILIMLVWCCSL  
CLA KSGGRCMFDEIAAKAGRPRVLALRRTKAGMENVKYDRTGSVDPEWQHIRIVVFA  
EDMKDRSRYCT SAGQERPTFFGETATCSQEDILTAAKRDIKAVTKLLPSAVQMMDR  
LLVDPITEPLVFPFPDGSVCSEFKVPSSHFFSEGVPDADMVMYAAAGPTPEGVA  
AWATGCITLDDGRAVAGVINLGPISLSETSIRTAHEIAHALGFDFEAMNDAGMVQ  
RIIPGVRGKVDVTLISSPRTLQKAREHYNCPDAPGMELEDEGGSGTALSHWERR  
NAKDEIMSGISSPGRYTALTMAAFEDLGYRGAWGSEEPMGWGNNSGCELLNESCL  
VNGVTAHPDMFCNETVSKLVCNSERDGLGRCNVIKHENPLPPQYHYFSDPSRGA  
PSHLLMDYCP SIDAFSNTPCADGETKFMRGSLIGPSSMCLKAEGLRDSQGVIGD  
VCADVRCDDGGEVSI RYLGDDAWHPCPEGSHIKPTTTFTDGVIVCPTYSEVCI  
KATVVVVRPSSASYSRSSVPQSLLLTLFAIVYAAC

38. *T.b.vivax* 1393e12.plk

MLVLFALLGVTGWCCTGGIAMPGCMFDSLMDKNGQSLPIAQEVLPTGPDALAAATAAST  
STLPV WATIRIMVSTRDMTDPSKICTHAGQSRPDLGAYKKCSAAAVLTAKKHENLLK  
RVVPGAVKMHTDRLEVRPVRGRIVVPLFSGLCANFHIPRDHRTRGVGGADTILYGA  
AGPVGGWSAWALACAALGDRPFAGVFNVPESLDIVDTSTRTVAHEIAHALGFSIS  
IASNLGMVKD VNVRGKGFVKMVTTRNVVRVARQLYNCELVGMELEDEGGAGTKH  
SHWERRNAMDEMAGARMVTGGYYSALTMAFFEDTGLYRAKWGAEEHTRWGRNAG  
CGFLSEKCVKNGTTHFPDMFCTEPARRHEFKCTHDRMALGVCTI



PEKSELKASKILRRITVPSAVAFPVTSPPGPSTGPFPAAPFAETYEGASPTSSTGASEDFSEEYSE  
ESSHEDSEGSSPMTRQLTGTSSWSAYSSYLMWNMLLFFVSCFSL

43. *T.b.gambiense* 1167d01.plk

MAVIMFPRYITPCLLGLILCGDVSEGNIPPHRCDFGKLMKNMSVREPPVVKGDLVHAIATSSAE  
VWHPIRFKVFKSDIDDPNKYCERVGETRSDFRGRNLMCTSYSVLTKEKKSLLDVVITDALKMHS  
DRLMVQPVHGPITVHRNQTFCNNFNIP EHHRTTGVSGADMVLYGAAGPMGSPA AWAGPCSR YRG  
QRPVVG VFNIGPEVLTSHDSSMRVTAHEIAHALGFGFKIMEERNLVEKRNNIRGKNDVWVVKSP  
TVVKKAQEFYGC DKITGVELEDEGGEGTINSHWERRIAMEEMMTGVKGS DGGRYSVLTMALFED  
MGFYKAIWGTEEDMHFGKGRGCE FLEKKCVENGRSNFPDV FCTPEAAKGN NICTSDRGGLGSCA  
IYLYTPALPAYRYFGDERKGGPKELLDYCPYIRLFSNGGCTNGDADVMKGSRIGPKSRCVKGT  
GLQIKKGNLIYIIVDDICVEVNCEPDTLQVRFVDEKWDYDCPEGSNVTSTVTFYKGSILCPKKSE  
LCASKVMKQVTTISPVTASGASVGD SAGTWAGDSPDASPVASPGPLGEP SAVAPIEGSSTVSSPV  
TEDGTGASSWSAYSSYLMWNMLLFFVSCFSL

44. *T.b.rhodesiense* MSPA2

MAVIMFPRYVIPCLLGLILCGDVSEGNIPPHRCDFGKLMKNMSVREPPVVKGDLVHAI VTSSTA  
GWQPIRFKVFDFDIKDPEKYCGREGEYRPNFKGNKLLCTADSVLTPQKKKSLLD AVIPDALKMH  
SDRLMVQPVQGPITVHRNQTFCNNFNIP EEHRTTGVSGADMVLYGAAGPMGSPA AWAGPCSR YK  
DHRPTVGVFNIGPEVLTSHDSSMRVTAHEIAHALGFGFDIMKERNLVEQRNDIRGKNDVWVVK S  
QTVVKKAQEFYGC DKITGVELEDEGGEGTINSHWERRIAMEEMMTGVKGS DGGRYSVLTMALFE  
DMGFYRAKWGTEEDMHFGKGRGCD FLEKKCVENGKSNFPDV FCTSETKPGENVCTADR GGLGSC  
AIYSYTPALPVRYQYFADITKGGPDDL DYCYPVRLFSNGGCTNGDSEIMIGSRIGPNSRCVEG  
AGLQVRRGNLIYIIHDI CVEVNCEPDILQIRFVDDNQWHNCPEGSKVTSTVALYNGSILCPKKS  
ELCASKEVKQVTTASPVVSPGPSTGASAKAPPGSSPVSSPGASA EPSAGPSAGPSEMPLAETKE  
VTGTSWALHSCYFMWNMLLFFVSCFPLL

45. *T.brucei* TREU927XM823757

MTVIMFPRYIIPFLLGLILCGDVTEGNIPPHRCDFGKLMKNMSMRDLPVVGEPVVKGDLVHAI  
VTSSTAGWQPIRFKVFKSDIEDRSKYCGSVGETRSNFRGTNYQCNTD SLLTKEKKSLLSVVIPD  
ALKMHTDRLMVQPVQGP IKVPKLQSF CNNFNIPQDHYTTGVSGADMVLYGAAGPMGSPA AWAGP  
CSRLKGRPVVGVFNIGPEVLTSHDSSMRVTAHEIAHALGFGFDIMEELKLV EKRNEIRGKNGV  
WVVKSQTVVKKARLFYGC DTLTGMELEDEGGEGTVKSHWERRIAMEEMMAGLKSSDGGRYSVLT  
MALFEDMGFYKAKWGTEEDMHFGKGRGCD FLEKRCVEDGKSNFPDV FCTSETKQGENICTSDRT  
GLGSCAISTYKSSLPTHYQYFSQSNRGGPGELLDYCPYIRVFSNTGCTNGDPKTMWGSRIGPNS  
RCVKATGLKLNIVAMADICVEVNCKPDILQVRFVGDQWHNCPEGRNVT SNVT FSSGSIQCP  
KKSELKASKVVKQTTSAQKGQKGASSWSAYSCYLMWNMLLFFVSCFSL

46. *T.gambiense* 11\_v2\_orf2

MAVIMYPRYVIPFLLGLILCGDVTEGNIPPHRCDFGKLMKNMSVREPSSGGEPVVKGDLVHAI  
VTSSTAGWHP IRFKVFKSDIEDPNKYCGSVGQTRSNFRGTNYQCNTD SLLTKEKKTLLDAVIPD  
ALKMHS DRLMVQPVHGP IKVPQLQSFCKNFNIPQDHYTTGVSGADMVLYGAAGPMGSPA AWAGP  
CSRLSGKRPVVGVFNIGPEVLTSHDSSMRVTAHEIAHALGFGFDIMKELKLVAQKRGIRGKNDV  
WVVTSP TVVEKARLFYGC DRITGMELEDEGGDGTKNTHWERRIAMEEMMAGLKSSDGGRYSVLT  
MALFEDMGFYRAKWGTEEDMHFGKGRGCD FLEKRCVENGRSNFPDV FCTSETKPGENVCTSDRG  
GLGSCAIHLHSSALPKHYQYFSQSNRGGPGELLDYCPYIRVFSNTGCSNGLREAMWGSRIGPNS

RCMKATGLKLLKKGIVPIGDICVEVNCESDTLRVRFVDDDRWHNCPEGSNVTSNVTFFSSGSIQCP  
KKSEFCSSKVLKQVASPEPSPATRQGTGTSWSAYSSYLMWNMLLFFVSCFSPIMI

47. *T.gambiense* 2537b02.p1k

MTVIMFPRYITPCLLGLILCGDVTEGNIPPHRCDFGKLMKNMSVRDLPVVGEPPVPGDLVHAI  
VTSSSAGWQPIRFKVFVKLDINDRRKYCGGVGETRSNFKGINYQCTDKSLLTPQKKSLLAVVIPD  
ALKMHSDRMLMVQPVHGP IKVPQLQSFCKYFNIP EHHYTKGVSDADMVLYGAAGPMGSPA AWAGP  
CAKLRNRPVTVGVFNIGPEVLTSHDSSMRVTAHEIAHALGFGFDIMEELKLV EKRNDIRGKNDV  
WVVKSP TVVKKARLFYGCNEIKGMELEDEGGDGTKNTHWERRIAMEEMMAGMKSSDGGRYSVLT  
MALFEDMGFYRAKWGTEEDMHFGKGRGCDLFLEKRCVENGKSNFPDVFCTSETKKGENVCTSDRT  
GLGSCAIHLHSSALPKHYQYFSQSNRGGPGELLDFCPYIRVFSNTGCSNGLREAMWGSRIGPNS  
RCMKATGLKLLKKGIVPIGDICVEVNCESDTLRVRFVDDDRWHNCPEGSNVTSNVTFFSSGSIQCP  
KKSEFCSSKVLKQVASPEPSPATRQGTGTSWSAYSSYLMWNMLLFFVSCFSPIMI

48. *T.brucei* TREU927XM823755

MTVIMFPRYVIPCLLGLILCGDVTEGNIPPHRCDFGKLMKNMSMRDLPVVDEPPVPGDLVHAI  
VTSSMAGWQPIRFKVFKSDIEDPKKYCGNVGETRSNFRGIYYKCKTESLLTSQKKSLLDAVIPD  
ALKMHSDRMLMVQPVKGRITVHREQSFCKNFNIPREHRTTGVSADADMVLYGAAGPMGSPA AWAVP  
CAKLRDGRPVVGVFNIGPEVLTSHDSSMRVTAHEIAHALGFGFDIMNERKLVASKSGIRGKGPV  
WVVKSQ TVVKKAQEFYGCNDITGVELEDEGGRTVRSWERRIAMEEMMAGIKGSDGGRYSVLT  
MALFEDMGFYKARWGTEEDMHFGKGRGCDLFQHTRIESGKSNFPDVFCTSATKKGENVCTADRG  
GLGSCAIYLYRTPIPQQYRYFSRVNKGPNELLDFCPYIRLFSNTGCTDGHPHAMWGSRIGPNS  
RCVKATGLKLLKNVIVAIADICVEVNCEPDTLQVRFVDDDQWYDCPEGRNVTSNVTFFSSGYVRCP  
KKSELCAASKVLKRVTVPSAVASEGSSEGSSEGSSEGSSEGSSEGSSEGSSESAESSEESSESEAPSPV  
DSEETEHTGAASWAVHSSYFMWNMLLFFVSFSL

49. *T.b.rhodesiense* MSPA1

MAVIMFPRYIIPCLLGLISCGDVTEGNIPPHRCDFGKLMKNMSMRDLPVVDEPPVPGDLVHAI  
VTSSMAGWQPIRFKVFKSDIKNPKKYCGNVGETRSNFRGIYYKCKTESVLTEKKKSLLDAVIPD  
ALKMHSDRMLMVQPVKGRITVYREQSFCRNFNIPREHRTKGVSDADMVLYGAAGPMGSPA AWAVP  
CAKLRNRPVTVGVFNIGPEVLTSHDSSMRVTAHEIAHALGFGFDIMNERKLVASKSGIRGKGPV  
WVVKSP TVVKKAQEFYGCNRITGVELEDEGGRTVRSWERRIAMEEMMAGIKGSDGGRYSVLT  
MALFEDMGFYKAKWGTEEDMHFGKGRGCDLFKCKCIENGRSNFPDVFCTSATKKGENVCTSDRG  
GLGSCAIYLYRTPIPQQYRYFSRVNKGPNELLDFCPYIRLFSNTGCTDGHPHAMWGSRIGPNS  
RCVKATGLKLLKNVIVAIADICVEVNCEPDTLQVRFVDDDEKWDYDCPEGRNVTSNVTFFSSGYIQCP  
KKSELCAASKVLKQVTVASAVVSPGSDGSSEGSSEGSSEGSSEGSSEGFEGPSPVDSSEVP SAESSEE  
YSEESSEAPSPVDSEETEHTGATSWALHSSYFMWNMLLFFVSCFSL

50. TcoMSPA

MEAREVWRRVAEVLVAVLLGSTCVCTASHEGFVHRCTFDAMMQNASNKALPVAIEVPHVPGDVL  
RAFTASSSDNWGP IRFTVFKSDISNSEKYCTKAGEVRSNFRGTNIVCSEESVLTERKKSLLLEEV  
IPAALKMHSDRMLTVKRTSNLIKIPQVTGFCTNFHIPAEHRTTGLTAVDMVLYGAAGPMGGKSAW  
AGPCAVLEDGRPFVGVFNIGPEILISVDASVRTMTHEIAHALGFGFDILQKLLKLV EVRNNIRGK  
PKTYVVTS PNVVNVARKYHNCD SITGVELEDEGFEGTVNSHWERRNLMPELMAGLMEHGGGLYS  
AFTMALFEDMGFYRAIWGREEQMRWGNVVGCAF LDKKCI EGGKSNFPDMFCTEEGRKGGATCTH  
DRMGLGRCRIGTTGSSSLPRHYQYFSEPNRGGVSPLMDYCPVVAGFSNADCANGDPGVMWGGRTG

PNSRCVEAHGIQLIGIVVSVGDI CVEVDCSSALLGVRVFGDDNWYPCKKGDHVTSNKSFMGGYI  
VCPERSQVCLARQLKIESVTAKSDKKKGGTSLGRSGDPLLRALTLYLPLACQLFFESLR

51. *T.b.vivax* 1124g05.plk

MEQRSSASAPRLLCAHVLVTLLSAVAMATTDNYKMLNESDYGCLVGDLPGDDYASIPAIPVPR  
QVGLVEAVTASATSPEWKPARFKVFTKDLDDPRKYCTEVGQIRSSFSLGNVRC TEEDVFTSAKK  
TILLNHNIPLGIKKHADRLSVQPITGVIVKVAEFRSLTCREFTVPAEHRITGLTDVDTVFYAAAA  
PVRGFSAWAVICATHDGG RPLVGFNIGPPSIAATLRAVNLVAHELALHALGFHDKVISARNMSR  
YVQDVRGKRLVRVNTPKVVEAARRHFKCDSLHGMELEDEGSSGTVGSHWKRRNAMDDL MCGVQ  
GTMGSFYSTLTMAFFEDSGFYKVSWGTEPEPMGWGYGAGCSFLEKKCVENDTSNFPWFCD SITP  
ERQKLCTADRRGLGKCQMAKFKEELPAHLQYFTNRSQGGGRSLMDCCPLVVAHSRTMCADGTAR  
ILPGSRLGSTSRCVKGEGLLPGSASHVPGDICEICCR LPTLGVRFAGDNTWYQCPAGERLAPR  
KGFKGGHIICPTRSQVCPDRSDRIFPIGGDVSQ LIPHVDPPSIKTCLSATGSFESPEDCANTRV  
IPSDLQADLLT C P S S R S R T M L N V P T A C L S N I G C T I I L T R F M L L A R P A L W G D L

52. *T.b.vivax* 1764g03.plk

MRGTHIYFVLLLLTSLSPQRTGGYGALDHTPDPRCLFGDQWQNNNSVERLPVVREIPVATGGLQQ  
AFIQEDEEPQWLP IRIMFFTFDLRNSSRYCTVSGTTRPNYRGGTAICTVNDILTDDKKAMLSAQ  
ILPQATKMHADRLLIKRRIQSVFVPTFRDNVCNSFTIPVAHRSKGVNQTDMILYVASGPSSTGG  
ASIAQACATLSNGRPIIGAINFAPGAIVRSGVSVRMAAHEIAHVLGFNYNTMKNLNMI TRLSNI  
RGKSI V T V N S T K V L E V A R T Y Y G C D S L A G V E L E D G G G R G V A G S H W E R R I A M D D L M A V N V G L S A Y  
SVLTMAFFEDTGFYKVVWEKGERMVWGRNAGCEF INEKCVTNNRTKYPNMFCTEPTDEKLYCTY  
DRQALGHCTLKNHKKTLRPEFQYFGDANIGGSDADAMDFCPIIAPYRDSYCTNGEQQLLGSRI  
GPHSRCIKGDGLQIHSEEVGDVCAEVQC SKGTVSLRYVGGDDKWYACPEGGYLTPTSFSGGRLVC  
PKWEEVCYDGLRPNVLSAVALLIWVCVGVVLVS

53. *T.coMSPE*

MHRSLCPTPHCRSTASIYSPRLHESTRVRMKENSFTVARALGACVSKWVIFILLSALFLCNVA  
CQDRDHS LN D T A V V E N D T A V N I T N A S E E D I A V V E G G T E K M V N G W T S L R V V V S T N D L D N P K R C C  
TLSGQERPDFMGGVAPCGEQDVLTTTEKRLTLTEYTI PGAIRLHYERLGVSMRMDNIIVPDFLSA  
VCSSFTVPESHRSVGVSGADVILYVAAGPTGRADYAHTRVCALLPSGRPAVGVINFSPSAISRS  
RSSLRAAAHEIAHILGFNNEVMRRLKMI STKVHRGKNSTFVITPKVVEVARKYYACKNMDGMQL  
EDGGNDDVRDSHWKRLFVKDDLMAAVVGASYYSALTTLAFFHDTGFYRVKWAMAERMWRWNGTGC  
GLMNGKCMKNNITMFLDMFCNESVSTKLHCTYERQAIGRCALNTYGAPLDPDKQYFTRSWIGGN  
QDNLMDYCPIVEPYKDSYCEDGRQQLLPGSRVGPNSRCVKGDRLVAFSREVGDVCAEVYCGRDA  
VSIRYSGDDSHVCP EGEYITPTKTFSSGRIICPKREEVCYNTDMSPPFDPHASVALLFLLTSS  
RRII

54. *T.brucei* TREU927XM823843

MTTFPPVYCTADATVSPSPAVCLLTAGCRRPCCSWRIALKVSFSQTP IAQCFSYNLLSFALCL  
RLCVAMRLRTQVVGIGQLRTSFTSRICMGRSNSVFFHLWLSFASLCLGNSDSSEGSPPVSNGT  
SPVVLSDQSVANMEANDSQWKPIRIVVSAKDLDDSLKYCVVAGVPRPDFMGGTLRCKTGDVLTN  
EKRLILTEHALPSAIHLHAERLLVGMEIDNIVPEFDSPACKSFTVPIHHRVSVGPQADIILYV  
ASGPAPHDGPAYATTCASLLSGRPIAGAINFSPSAITESYLYIRTVAHEIAHVLGFNF EAMKQL  
NMVGTKNIRGKSSVKVVKTPNVVKVARQYYGCGKITGMELEDNGDSDVRNSHWKRRRIARDDLMT  
AIMGVSHYSELTLAFFLD TGFYRVNWEKGERMRWGHGAGCSFIEGKCMENNETNFPDMFCNDSA  
ETLSCTHDRQALGRCTVHSYAVPIEESVRYFTMSWVGGSDNNLMDYCPVVEPYTDSYCRDGRRE



LLPGSRIGESSRCVKGEGLVAFTTHVGDICVEIHCGKRRGVSIRYSGDDSWHVCPEGGHVTPDK  
TFSEGRIVCPKWEEVCDDNAMTLSCLAAVFAIFVSALS LVV

55. *T.gambiense* 11\_v2\_orf1

MTTFPPVYCTADATVSLSPAVCLLAAGCRRPCCSWRIVLKVNF SQTPIAQCFSYNLLSFALCL  
RLCVAMRLRTQVVGIGQLRTSFTSRICMGRRSNSVFFHLWLSFASLCLGNSDSSEGSPPVSNGT  
SPVVLSDQSVANMEANDSQWKP I RIVVSAKDLDDSLKYCVVAGVPRPDFMGGTLRCKTGDVLTN  
EKRLILTEHALPSAIHLHAERLLVGMEIDNIVVPEFDSPACKSFTVP IHHRVGVVPQADI ILYV  
ASGPAPHDGPAYATT CASLLSGRPIAGAINFSPSAITESYLYIRTVAHEIAHV LGFNFEAMKQL  
NMVGTKNIRGKSSVKVVKTPNVVKVARQYYGCGKITGMELEDNGDDSVRNSHWKRRIARDLMT  
AIMGVSHYSELTLAFFLDTGFYRVNWEKGERMRWGHGAGCSF IEGKCMENNETNFPDMFCNDSA  
ETLSCTHDRQALGRCTVHSYAVPIEESVRYFTMSWVGSDNNLMDYCPVVEPYTDSYCRDGRRE  
LLPGSRIGESSRCVKGEGLVAFTTHVGDICVEIHCGKRRGVSIRYSGDDSWHVCPEGGHVTPDK  
TFSEGRIVCPKWEEVCDDNAMTLSCLAAVFAIFVSALS LVV
